# Supplementary material for: Impact of humanised isolation and culture conditions on stemness and osteogenic potential of bone marrow derived mesenchymal stromal cells
Source: PubMed Central journal article supplement (PMC6831606; doi:10.1038/s41598-019-52442-9), 2019-11-05
Supplement: 41598_2019_52442_MOESM1_ESM.pdf [file 41598_2019_52442_MOESM1_ESM.pdf]

**Impact of humanised isolation and culture conditions on stemness and osteogenic potential of bone marrow derived mesenchymal stromal cells**

Salwa Suliman<sup>1\*</sup>, Hassan R. W. Ali<sup>1</sup>, Tommy A. Karlsen<sup>2</sup>, Jerome Amiaud<sup>3</sup>, Samih Mohamed-Ahmed<sup>1</sup>, Pierre Layrolle<sup>3</sup>, Daniela E. Costea<sup>4,5,6</sup>, Jan E. Brinchmann<sup>2,7</sup>, Kamal Mustafa<sup>1\*</sup>

**Supplementary Table 1. Real time qPCR primers**

| <b>GENE (HUMAN)</b> | <b>ASSAY ID</b> | <b>AMPLICON LENGTH</b> |
|---------------------|-----------------|------------------------|
| GAPDH               | Hs 02758991_g1  | 93                     |
| CD90/THY1           | Hs 00174816_m1  | 60                     |
| NANOG               | Hs 02387400_g1  | 109                    |
| Oct-4/POU5F1        | Hs 00999632_g1  | 77                     |
| IL-1 $\alpha$       | Hs 001714092_m1 | 69                     |
| IL-1 $\beta$        | Hs 01555410_m1  | 91                     |
| IL-6                | Hs 00174131_m1  | 95                     |
| CXCL8/IL-8          | Hs 00174103_m1  | 101                    |
| RUNX2               | Hs 01047973_m1  | 86                     |
| COL1 $\alpha$ 1     | Hs 00164004_m1  | 66                     |
| ALP                 | Hs 01029144_m1  | 79                     |
| BMP-2               | Hs 00154192_m1  | 60                     |
| BSP/IBSP            | Hs00913377_m1   | 87                     |
| OC/BGLAP            | Hs 01587813_g1  | 166                    |
| PPARG               | Hs 00234592_m1  | 77                     |
| CEBPA               | Hs 00269972_s1  | 77                     |
| LPL                 | Hs 00173425_m1  | 103                    |
| PARG1/ARHGAP2       | Hs 00191351_m1  | 69                     |
| CDKN2A              | Hs 00923894_m1  | 115                    |
| PTN                 | Hs 01085691_m1  | 62                     |
| <b>GENE (MOUSE)</b> | <b>ASSAY ID</b> | <b>AMPLICON LENGTH</b> |
| GAPDH               | Mm 99999915_g1  | 109                    |
| IL-1 $\alpha$       | Mm00439620_m1   | 68                     |
| IL-1 $\beta$        | Mm 00434228_m1  | 90                     |
| IL-6                | Mm 00446190_m1  | 78                     |
| IL-8/CXCL15         | Mm 00441263_m1  | 66                     |
| RUNX2               | Mm 00501583_m1  | 65                     |
| COL1 $\alpha$ 2     | Mm 00801666_g1  | 89                     |
| ALP                 | Mm 00475834_m1  | 65                     |
